# Supplementary material for: Non-small cell lung cancer is characterised by a distinct inflammatory signature in serum compared with chronic obstructive pulmonary disease
Source: PubMed Central journal article supplement (PMC5133367; doi:10.1038/cti.2016.65), 2016-11-02
Supplement: cti201665x1.pdf [file cti201665x1.pdf]

## Supplementary information

Table S1. Circulating cytokines and MMPs in NSCLC and COPD patients with median concentrations values and ranges.

| <b>Cytokine</b>      | <b>NSCLC subjects<br/>Median (range)</b> | <b>COPD subjects<br/>Median (range)</b> | <b>p-value</b>    |
|----------------------|------------------------------------------|-----------------------------------------|-------------------|
| CCL1/I-309           | 77 (48-283)                              | 89 (65-128)                             | <b>0.041</b>      |
| MCP-1 (CCL2)         | 74 (11-203)                              | 80 (32-172)                             | 0.550             |
| MCP-2 (CCL8)         | 61 (13-192)                              | 80 (25-164)                             | 0.190             |
| MCP-3 (CCL7)         | 87 (35-153)                              | 96 (57-150)                             | 0.133             |
| MCP-4 (CCL13)        | 81 (32-358)                              | 80 (47-173)                             | 0.662             |
| RANTES (CCL5)        | 11872 (6271-25588)                       | 15941 (6119-22197)                      | 0.327             |
| MIP-1A (CCL13)       | 15 (8-49)                                | 16 (10-27)                              | 0.615             |
| MIP-1sigma (CCL15)   | 9424 (675-20703)                         | 7859 (3778-44283)                       | 0.358             |
| MIP-3a (CCL20)       | 24 (10-195)                              | 17 (9-303)                              | <b>0.036</b>      |
| MIP-3b (CCL19)       | 919 (130-2777)                           | 606 (213-1720)                          | <b>0.029</b>      |
| TARC (CCL17)         | 400 (49-1561)                            | 253 (81-977)                            | <b>0.011*</b>     |
| Eotaxin (CCL11)      | 63 (31-128)                              | 72 (45-178)                             | <b>0.037</b>      |
| Eotaxin-2 (CCL24)    | 383 (74-1846)                            | 484 (66-1054)                           | 0.402             |
| Eotaxin-3 (CCL26)    | 52 (14-227)                              | 48 (26-85)                              | 0.530             |
| CCL21                | 6399 (3636-8571)                         | 6607 (2434-11019)                       | 0.098             |
| MDC (CCL22)          | 795 (179-2566)                           | 1006 (310-1836)                         | 0.200             |
| MPIF-1 (CCL23)       | 473 (32-1875)                            | 427(135-915)                            | 0.222             |
| TECK (CCL25)         | 707 (363-1437)                           | 787 (457-1192)                          | 0.131             |
| CCL27                | 1635 (716-5984)                          | 1450 (446-2748)                         | 0.436             |
| Gro-a (CXCL1)        | 320 (152-623)                            | 299 (215-437)                           | 0.557             |
| Gro-b (CXCL2)        | 878 (155-1641)                           | 514 (71-797)                            | <b>&lt;0.001*</b> |
| CXCL5                | 875 (121-2221)                           | 807 (219-1439)                          | 0.537             |
| GCP-2 (CXCL6)        | 45 (10-118)                              | 34 (22-97)                              | 0.197             |
| MIG                  | 749 (114-24748)                          | 599 (222-1458)                          | 0.092             |
| I-TAC                | 44 (10-417)                              | 38 (13-138)                             | 0.100             |
| IP-10                | 230 (66-11983)                           | 223 (64-524)                            | 0.424             |
| SDF-1a+b             | 2317 (746-4158)                          | 2117 (658-3424)                         | 0.612             |
| CXCL13               | 54 (27-842)                              | 36 (15-334)                             | <b>&lt;0.001*</b> |
| SCYB16               | 562 (116-954)                            | 591 (206-862)                           | 0.313             |
| Fractalkine (CX3CL1) | 254 (96-1250)                            | 212 (120-491)                           | <b>0.025</b>      |
| IL-1b                | 8.5 (2.3-34.3)                           | 7.6 (4.8-19.9)                          | 0.124             |
| IL-1ra               | 434 (14-4161)                            | 1079 (748-1396)                         | <b>&lt;0.001*</b> |
| IL-2                 | 21 (7-77)                                | 23 (14-53)                              | 0.273             |
| IL-4                 | 24 (13-91)                               | 25 (15-64)                              | 0.988             |
| IL-6                 | 27 (6-103)                               | 16 (10-35)                              | <b>0.002*</b>     |
| IL-8 (CXCL8)         | 31 (9-69)                                | 21 (12-67)                              | <b>&lt;0.001*</b> |
| IL-10                | 76 (28-198)                              | 56 (18-96)                              | <b>0.016</b>      |
| IL-12p70             | 70 (6-226)                               | 74 (21-155)                             | 0.517             |
| IL-16                | 370 (227-1297)                           | 532 (310-1261)                          | <b>&lt;0.001*</b> |
| IL-17A               | 73 (8-367)                               | 273 (181-386)                           | <b>&lt;0.001*</b> |
| IFN $\gamma$         | 62 (22-179)                              | 63 (39-100)                             | 0.767             |
| TNF $\alpha$         | 49 (5-147)                               | 51 (8-116)                              | 0.972             |
| TRAIL                | 62 (16-641)                              | 66 (25-139)                             | 0.196             |
| MIF                  | 808 (315-67945)                          | 4895 (1067-14729)                       | <b>&lt;0.001*</b> |
| G-CSF                | 33 (11-234)                              | 127 (90-144)                            | <b>&lt;0.001*</b> |
| GM-CSF               | 37 (1-114)                               | 299 (215-437)                           | 0.396             |
| PDGF-BB              | 3288 (461-6538)                          | 2357 (992-4362)                         | <b>0.003*</b>     |
| VEGF                 | 106 (6-425)                              | 110 (43-316)                            | 0.837             |
| MMP-1                | 1481 (81-10606)                          | 1434 (343-6200)                         | 0.988             |

|        |                     |                      |                   |
|--------|---------------------|----------------------|-------------------|
| MMP-2  | 37242 (10902-85148) | 89243 (29936-168547) | <b>&lt;0.001*</b> |
| MMP-3  | 6713 (263-42008)    | 7497 (2665-33029)    | 0.413             |
| MMP-7  | 3247 (755-12000)    | 3608 (2066-13884)    | 0.094             |
| MMP-8  | 9436 (1337-121996)  | 5072 (1253-17289)    | <b>&lt;0.001*</b> |
| MMP-9  | 48102 (3826-152502) | 38453 (10500-125935) | 0.524             |
| MMP-10 | 3315 (1190-94090)   | 3130 (1109-5783)     | 0.353             |
| MMP-12 | 871 (52-3088)       | 347 (131-1183)       | <b>&lt;0.001*</b> |
| MMP-13 | 124 (30-532)        | 156 (46-589)         | 0.109             |

Concentration values measured in pg/ml. Statistically significant p-values are written in bold letters.

\*Statistically significant p-values retained after correction for multiple testing. Abbreviations: NSCLC, non small cell lung cancer; COPD, chronic obstructive pulmonary disease.

Table S2. Significant cytokines and MMPs in serum comparing NSCLC and COPD patients, both in whole cohort and in subjects without use of systemic steroids (significant values only).

| Cytokine/MMP         | All subjects                |                            |        | Subjects without systemic steroids |                            |         |
|----------------------|-----------------------------|----------------------------|--------|------------------------------------|----------------------------|---------|
|                      | NSCLC<br>(n = 43)<br>median | COPD<br>(n = 35)<br>median | p      | NSCLC<br>(n = 29)<br>median        | COPD<br>(n = 31)<br>median | p       |
| CCL1/I-309           | 77                          | 89                         | 0.041  | 81                                 | 89                         | 0.031   |
| MIP-3a (CCL20)       | 24                          | 17                         | 0.036  | 25                                 | 17                         | 0.021   |
| MIP-3b (CCL19)       | 919                         | 606                        | 0.029  | 948                                | 647                        | 0.015   |
| TARC (CCL17)         | 400                         | 253                        | 0.011* |                                    |                            |         |
| Eotaxin (CCL11)      | 63                          | 72                         | 0.037  | 63                                 | 72                         | <0.001* |
| Gro-b (CXCL2)        | 878                         | 514                        | 0.000* | 880                                | 520                        | <0.001* |
| CXCL13               | 54                          | 36                         | 0.002* | 51                                 | 33                         | 0.029   |
| MIG (CXCL9)          |                             |                            |        | 787                                | 556                        | 0.034   |
| I-TAC (CXCL11)       |                             |                            |        | 45                                 | 38                         | 0.043   |
| Fractalkine (CX3CL1) | 254                         | 212                        | 0.025  | 254                                | 210                        | <0.001* |
| IL1ra                | 434                         | 1079                       | 0.000* | 486                                | 1079                       | 0.001*  |
| IL-6                 | 27                          | 16                         | 0.002* | 28                                 | 17                         | <0.001* |
| IL-8 (CXCL8)         | 31                          | 21                         | 0.000* | 31                                 | 21                         | 0.003*  |
| IL-10                | 76                          | 56                         | 0.016  | 85                                 | 57                         | <0.001* |
| IL-16                | 370                         | 532                        | 0.000* | 326                                | 525                        | <0.001* |
| IL17A                | 73                          | 273                        | 0.000* | 88                                 | 265                        | <0.001* |
| MIF                  | 808                         | 4895                       | 0.000* | 775                                | 4895                       | <0.001* |
| G-CSF                | 33                          | 127                        | 0.000* | 39                                 | 127                        | 0.007*  |
| PDGF-BB              | 3288                        | 2357                       | 0.003* | 3444                               | 2357                       | <0.001* |
| MMP2                 | 37242                       | 89243                      | 0.000* | 37242                              | 89242                      | 0.011*  |
| MMP3                 |                             |                            |        | 5681                               | 7497                       | 0.008*  |
| MMP8                 | 9436                        | 5072                       | 0.000* | 8493                               | 5072                       | <0.001* |
| MMP12                | 871                         | 347                        | 0.000* | 1050                               | 347                        | 0.031   |

Concentration values measured in pg/ml. \*Statistically significant p-values adjusted for multiple testing.

Abbreviations: NSCLC, non-small cell lung cancer; COPD, chronic obstructive pulmonary disease; MMP, matrix metalloproteinase.

Table S3. Significant different cytokines in clinical subsets of NSCLC patients (p-values in bold letters retained statistical significance after correction by FDR).

| Cytokine          | All patients<br>(n=43) |              | Patients without systemic steroids<br>(n=29) |         |
|-------------------|------------------------|--------------|----------------------------------------------|---------|
|                   | Median(range)          | p – value    | Median(range)                                | p-value |
| <b>Sex:</b>       |                        |              |                                              |         |
| CCL27             |                        |              |                                              |         |
| Female:           | 2030(1172-5984)        | 0.016        |                                              |         |
| Male:             | 1540(716-2618)         |              |                                              |         |
| Eotaxin (CCL11)   |                        |              |                                              |         |
| Female:           | 79(39-128)             | 0.046        |                                              |         |
| Male:             | 62(34-121)             |              |                                              |         |
| GM-CSF            |                        |              |                                              |         |
| Female:           | 49(19-114)             | 0.030        |                                              |         |
| Male:             | 35(1-84)               |              |                                              |         |
| MMP-3             |                        |              |                                              |         |
| Female:           |                        |              | 3284(263-25143)                              | 0.018   |
| Male:             |                        |              | 6053(3070-34964)                             |         |
| <b>Age:</b>       |                        |              |                                              |         |
| CXCL13            |                        |              |                                              |         |
| ≤60:              | 41(34-109)             | 0.032        | 38(34-47)                                    | 0.030   |
| >60:              | 58(27-842)             |              | 54(27-842)                                   |         |
| CCL27             |                        |              |                                              |         |
| ≤60:              | 1172(804-1703)         | 0.022        |                                              |         |
| >60:              | 1721(716-5984)         |              |                                              |         |
| MIG (CXCL9)       |                        |              |                                              | 0.016   |
| ≤60:              |                        |              | 406(237-623)                                 |         |
| >60:              |                        |              | 892(120-3578)                                |         |
| MPIF1 (CCL23)     |                        |              |                                              |         |
| ≤60:              | 253(158-335)           | 0.002        | 313(158-335)                                 | 0.043   |
| >60:              | 499(32-1875)           |              | 505(32-1875)                                 |         |
| <b>Smoking:</b>   |                        |              |                                              |         |
| CXCL5             |                        |              |                                              |         |
| Current:          | 1089(523-2221)         | 0.032        |                                              |         |
| Former:           | 738(121-1999)          |              |                                              |         |
| Eotaxin (CCL11)   |                        |              |                                              |         |
| Current:          | 87(55-128)             | <b>0.001</b> | 78(55-121)                                   | 0.013   |
| Former:           | 59(34-90)              |              | 60(38-90)                                    |         |
| Eotaxin-2 (CCL24) |                        |              |                                              |         |
| Current:          |                        |              | 623(240-786)                                 | 0.039   |
| Former:           |                        |              | 311(74-923)                                  |         |
| Gro-a (CXCL1)     |                        |              |                                              |         |
| Current:          | 365(311-588)           | <b>0.001</b> | 365(319-587)                                 | 0.010   |
| Former:           | 290(153-6)             |              | 298(153-497)                                 |         |
| CCL1/I-309        |                        |              |                                              |         |
| Current:          | 93(75-283)             | 0.005        |                                              |         |
| Former:           | 73(75-283)             |              |                                              |         |
| IFN $\gamma$      |                        |              |                                              |         |
| Current:          | 71(41-179)             | 0.034        |                                              |         |
| Former:           | 51(22-105)             |              |                                              |         |
| IL-1b             |                        |              |                                              |         |
| Current:          | 8(5-34)                | 0.011        |                                              |         |
| Former:           | 7(2-12)                |              |                                              |         |

|                      |                 |          |                 |       |
|----------------------|-----------------|----------|-----------------|-------|
| IL-2                 |                 |          |                 |       |
| Current:             | 27(16-76.6)     | 0.017    |                 |       |
| Former:              | 19(7-41)        |          |                 |       |
| IL-4                 |                 |          |                 |       |
| Current:             | 31(23-91)       | < 0.0001 | 31(23-38)       | 0.013 |
| Former:              | 21(13-38)       |          | 23(15-38)       |       |
| SDF-1a+b<br>(CXCL12) |                 |          |                 |       |
| Current:             | 2741(1713-4158) | 0.003    | 2741(1713-4158) | 0.010 |
| Former:              | 1994(746-3212)  |          | 2290(1018-3212) |       |
| TNF $\alpha$         |                 |          |                 |       |
| Current:             | 60(37-125)      | 0.037    |                 |       |
| Former:              | 45(5-147)       |          |                 |       |
| PDGF-BB              |                 |          |                 |       |
| Current:             | 4127(2687-6244) | 0.006    | 4127(2687-6344) | 0.011 |
| Former:              | 2949(461-6538)  |          | 2808(461-5444)  |       |
| VEGF                 |                 |          |                 |       |
| Current:             | 125(74-425)     | 0.042    |                 |       |
| Former:              | 92(6-304)       |          |                 |       |
| MMP1                 |                 |          |                 |       |
| Current:             | 2596(423-9385)  | 0.042    | 3022(10-9385)   | 0.026 |
| Former:              | 1291(81-10606)  |          | 1291(319-6224)  |       |

---

**Histology:**

|                          |             |       |                |       |
|--------------------------|-------------|-------|----------------|-------|
| CXCL13                   |             |       |                |       |
| Adenocarcinoma:          | 51(27-486)  | 0.029 |                |       |
| Squamous cell carcinoma: | 72(30-842)  |       |                |       |
| Others:                  | 356(54-414) |       |                |       |
| MMP-12                   |             |       |                |       |
| AC:                      |             |       | 644(347-2982)  | 0.011 |
| SCC:                     |             |       | 1478(858-2752) |       |
| Others:                  |             |       | No patients    |       |

---

**Stage:**

|                                   |                |       |                |       |
|-----------------------------------|----------------|-------|----------------|-------|
| CXCL13                            |                |       |                |       |
| III:                              |                |       | 59(47-842)     | 0.015 |
| IV:                               |                |       | 48(27-187)     |       |
| CXCL1/<br>Fractalkine<br>(CX3CL1) |                |       |                |       |
| III:                              |                |       | 349(165-490)   | 0.030 |
| IV:                               |                |       | 243(96-372)    |       |
| Gro-b (CXCL2)                     |                |       |                |       |
| III:                              | 675(155-947)   | 0.002 | 703(155-947)   | 0.010 |
| IV:                               | 1054(385-1641) |       | 1029(385-1641) |       |
| IP-10 (CXCL10)                    |                |       |                |       |
| III:                              |                |       | 388(157-520)   | 0.023 |
| IV:                               |                |       | 218(120-873)   |       |
| MIG (CXCL9)                       |                |       |                |       |
| III:                              |                |       | 1112(696-3578) | 0.008 |
| IV:                               |                |       | 637(120-1390)  |       |
| IL-1ra                            |                |       |                |       |
| III:                              | 1050(14-1372)  | 0.039 |                |       |
| IV:                               | 279(14-4162)   |       |                |       |

|        |                    |       |                |       |
|--------|--------------------|-------|----------------|-------|
| TRAIL  |                    |       |                |       |
| III:   | 69(22-641)         | 0.034 |                |       |
| IV:    | 51(16-164)         |       |                |       |
| MMP2   |                    |       |                |       |
| III:   | 44002(27391-85148) | 0.019 |                |       |
| IV:    | 34847(10902-66453) |       |                |       |
| MMP-12 |                    |       |                |       |
| III:   |                    |       | 1911(644-3088) | 0.026 |
| IV:    |                    |       | 904(37-2752)   |       |
| MMP-13 |                    |       |                |       |
| III:   | 194(93-532)        | 0.006 |                |       |
| IV:    | 86(30-433)         |       |                |       |

---

**ECOG:**

|       |             |       |  |  |
|-------|-------------|-------|--|--|
| TRAIL |             |       |  |  |
| 0:    | 79(63-98)   | 0.019 |  |  |
| 1:    | 61(179-641) |       |  |  |
| 2:    | 42(16-113)  |       |  |  |

---

**CRP:**

|               |                 |                   |                 |       |
|---------------|-----------------|-------------------|-----------------|-------|
| CXCL2/Gro-a   |                 |                   |                 |       |
| ≤ 10          | 278(168-378)    | 0.031             |                 |       |
| > 10          | 339(153-623)    |                   |                 |       |
| CXCL2/Gro-b   |                 |                   |                 |       |
| ≤ 10          | 592(208-1156)   | <b>0.001</b>      |                 |       |
| > 10          | 1029(155-1641)  |                   |                 |       |
| IL-4          |                 |                   |                 |       |
| ≤ 10          | 20(13-36)       | 0.029             |                 |       |
| > 10          | 28(16-38)       |                   |                 |       |
| IL-6          |                 |                   |                 |       |
| ≤ 10          | 14(6-49)        | <b>&lt; 0.001</b> | 21(10-49)       | 0.023 |
| > 10          | 29(13-103)      |                   | 30(13-103)      |       |
| IL-8          |                 |                   |                 |       |
| ≤ 10          | 25(9-51)        | 0.008             |                 |       |
| > 10          | 35(18-62)       |                   |                 |       |
| MDC (CCL22)   |                 |                   |                 |       |
| ≤ 10          |                 |                   | 1002(727-2566)  | 0.046 |
| > 10          |                 |                   | 777(29-1813)    |       |
| MIP-1A (CCL3) |                 |                   |                 |       |
| ≤ 10          | 13(8-23)        | 0.019             |                 |       |
| > 10          | 16(9-29)        |                   |                 |       |
| IL-12p70      |                 |                   |                 |       |
| ≤ 10          | 49(6-160)       | 0.048             |                 |       |
| > 10          | 45(16-226)      |                   |                 |       |
| PDGF-BB       |                 |                   |                 |       |
| ≤ 10          | 2628(1221-4256) | 0.048             |                 |       |
| > 10          | 3525(461-6538)  |                   |                 |       |
| VEGF          |                 |                   |                 |       |
| ≤ 10          | 68(6-199)       | 0.005             |                 |       |
| > 10          | 138(20-425)     |                   |                 |       |
| MMP-1         |                 |                   |                 |       |
| ≤ 10          | 1009(375-4083)  | 0.009             |                 |       |
| > 10          | 2095(81-10606)  |                   |                 |       |
| MMP-8         |                 |                   |                 |       |
| ≤ 10          |                 |                   | 4942(2883-9436) | 0.004 |

> 10

10731(1337-121996)

---

**Previous  
chemotherapy**

MIP-1sigma  
(CCL15)

|     |                  |       |  |  |
|-----|------------------|-------|--|--|
| Yes | 10768(675-20703) | 0.032 |  |  |
| No  | 8817(675-17060)  |       |  |  |

MDC (CCL22)

|     |                |       |                 |       |
|-----|----------------|-------|-----------------|-------|
| Yes | 1058(183-1813) | 0.010 | 1102 (553-1813) | 0.006 |
| No  | 646(179-2566)  |       | 748(299-2566)   |       |

Fractalkine  
(CX3CL1)

|     |               |       |              |       |
|-----|---------------|-------|--------------|-------|
| Yes | 285(170-1250) | 0.047 | 270(170-490) | 0.022 |
| No  | 234(96-530)   |       | 234(96-418)  |       |

MMP-7

|     |                   |       |                  |       |
|-----|-------------------|-------|------------------|-------|
| Yes | 4167 (1780-12000) | 0.010 | 5396(1780-12000) | 0.003 |
| No  | 2678(755-6244)    |       | 2815(755-6244)   |       |

MMP-8

|     |                    |       |  |  |
|-----|--------------------|-------|--|--|
| Yes | 6899(1337-21857)   | 0.050 |  |  |
| No  | 12707(1569-121996) |       |  |  |

MMP-9

|     |                     |       |                     |       |
|-----|---------------------|-------|---------------------|-------|
| Yes | 28759(1289-115763)  | 0.050 | 26130(3826-59561)   | 0.045 |
| No  | 56336(12823-152502) |       | 49789(12823-113502) |       |

---

Concentration values measured in pg/ml. Abbreviations: NSCLC, non-small cell lung carcinoma; AC, adenocarcinoma; SCC, squamous cell carcinoma.

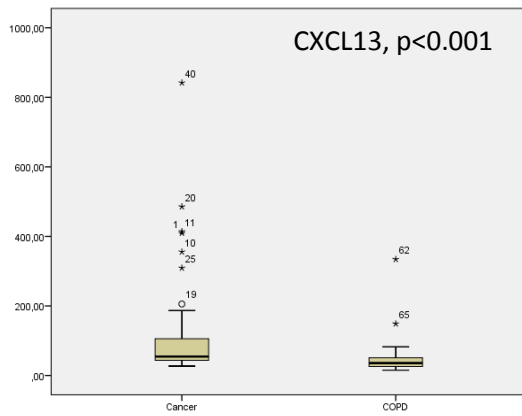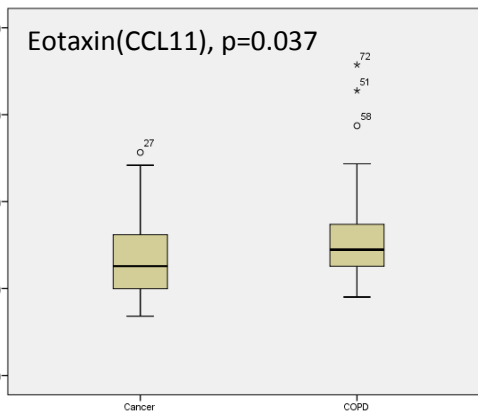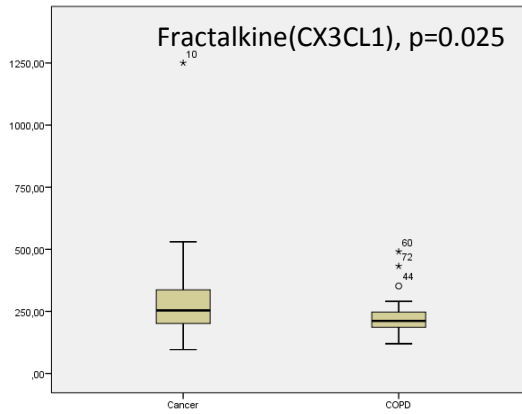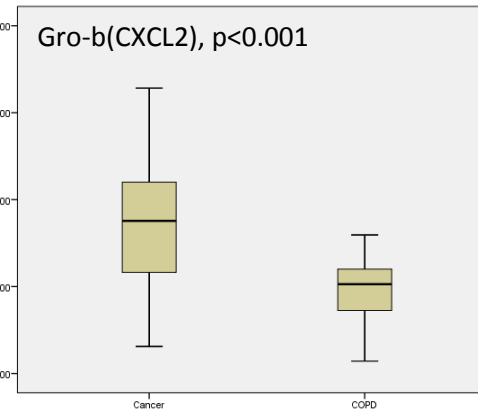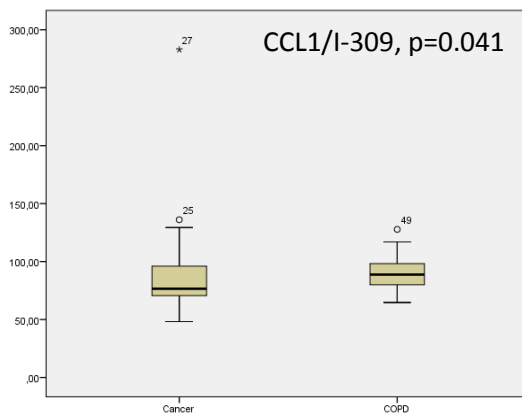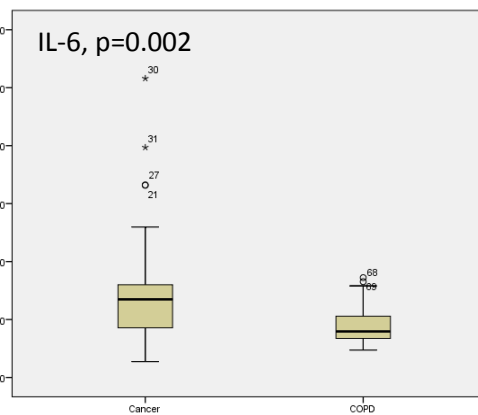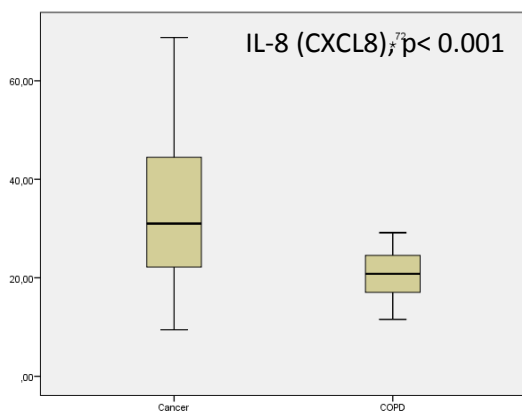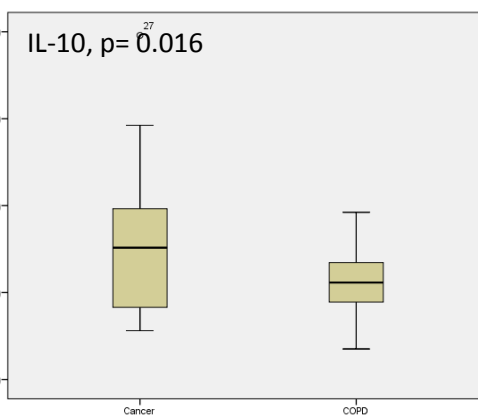

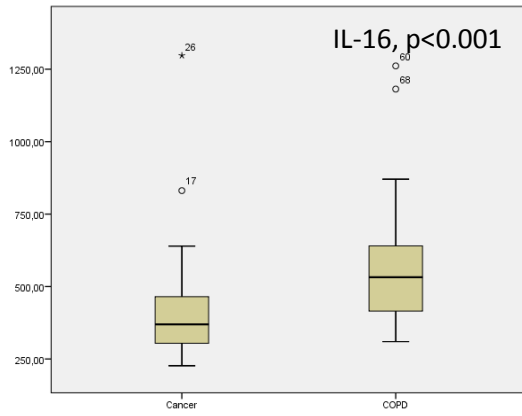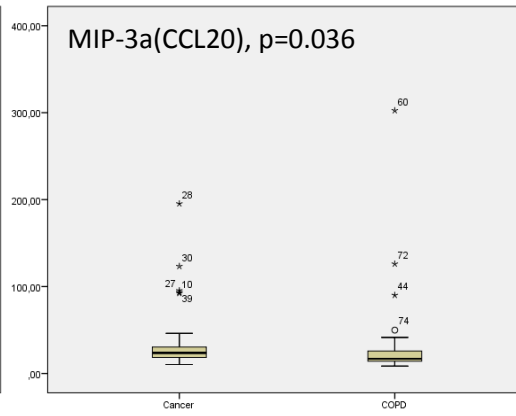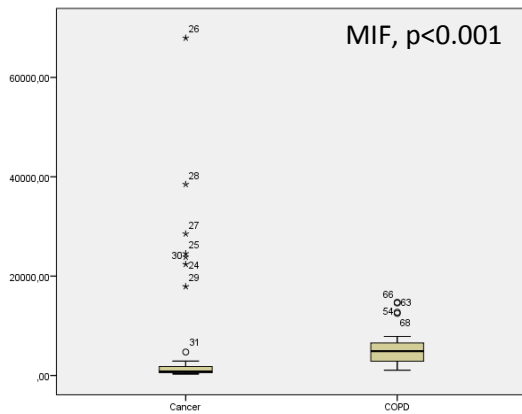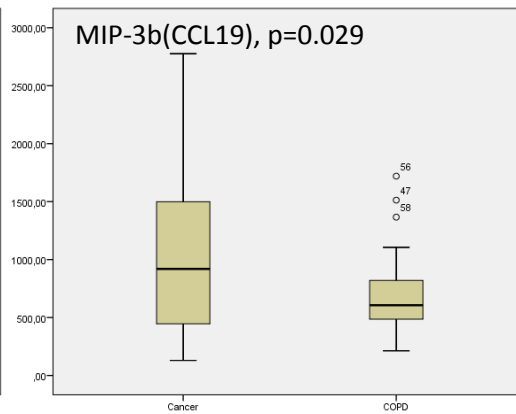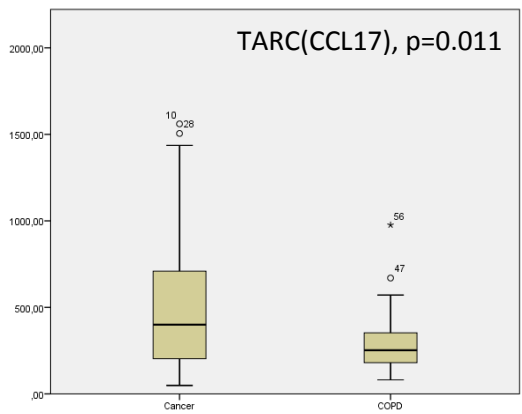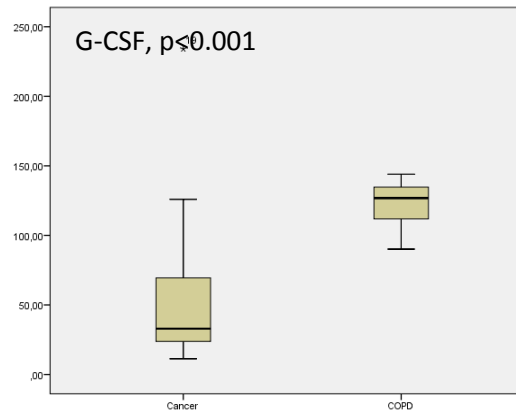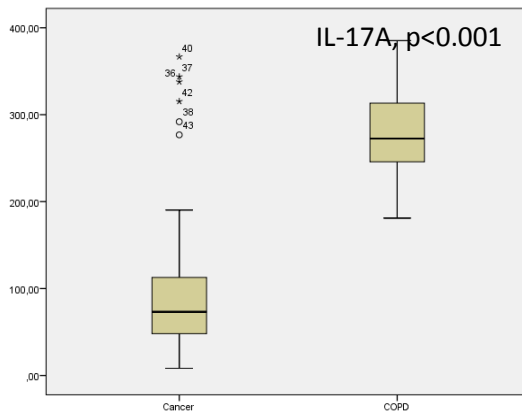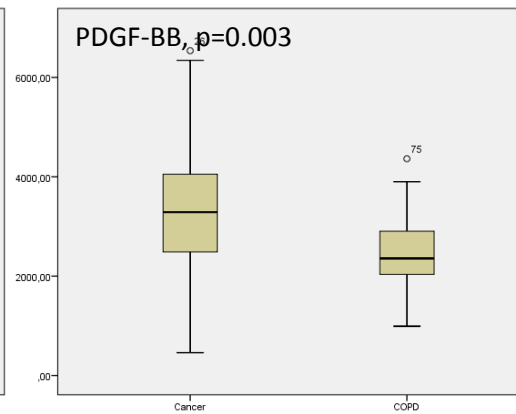



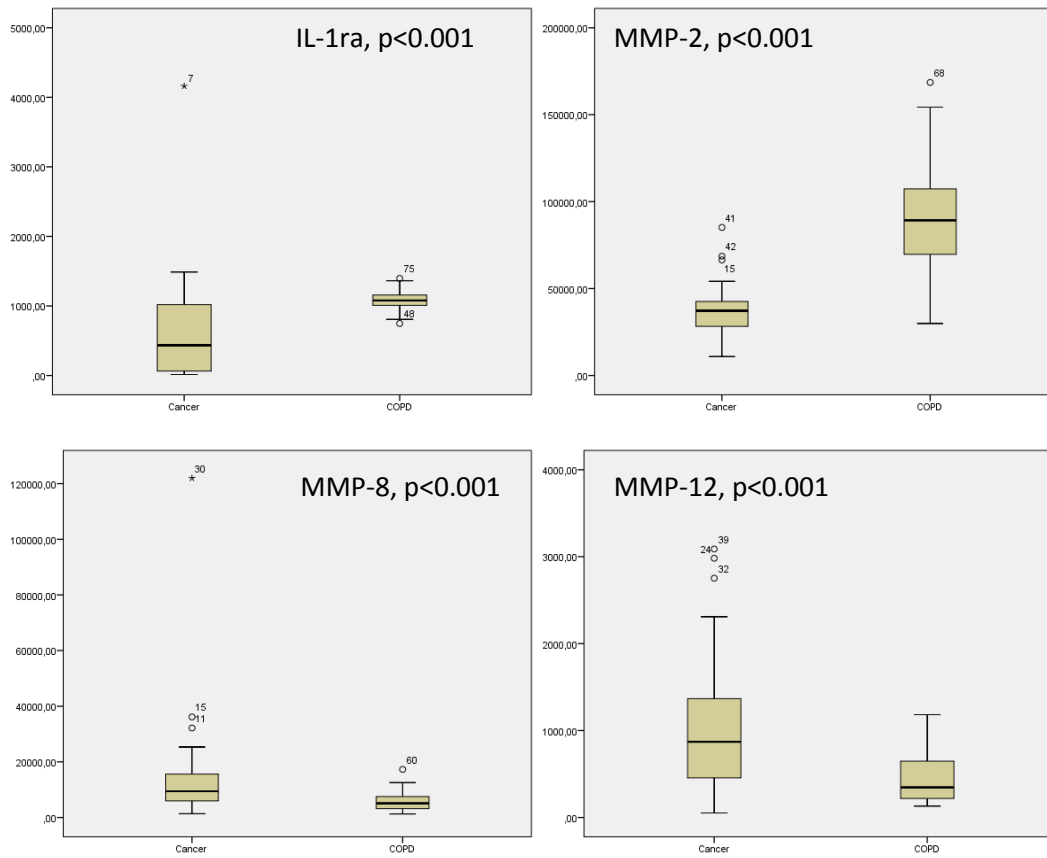

Figure S1. Box plots illustrating significant differences in cytokine concentrations in NSCLC and COPD patients. All concentration values (y-axis) measured in pg/ml.
